# Supplementary material
Source: PubMed Central journal article supplement (PMC7253305)
Supplement: 10-1055-s-0039-1688773-s180277.pdf [file 10-1055-s-0039-1688773-s180277.pdf]

**Supplementary Table S1** Variables associated with each individual case involving a meningioma lesion

| Lesion Type                     | Primary Location   | Diameter | PO   | 3M   | 12M  | LFU  |
|---------------------------------|--------------------|----------|------|------|------|------|
| <b>Meningothelial (Grade I)</b> |                    |          |      |      |      |      |
| Case 1                          | Cavernous          | 49       | Exo  | Exo  | Exo  | ---  |
| Case 2                          | Cavernous          | 48       | Exo  | Exo  | Exo  | Exo  |
| Case 3                          | Cavernous          | 38       | Norm | Norm | Norm | Norm |
| Case 4                          | Cavernous          | 30       | Exo  | Exo  | Exo  | Exo  |
| Case 5                          | Cavernous          | 25       | Exo  | Norm | Exo  | ---  |
| Case 6                          | Clinoid            | 60       | Norm | Norm | Norm | ---  |
| Case 7                          | Clinoid            | 29       | Norm | Norm | Norm | ---  |
| Case 8                          | Clinoid            | 27       | Norm | Norm | Norm | ---  |
| Case 9                          | Middle Fossa       | 40       | Norm | Norm | Norm | ---  |
| Case 10                         | Middle Fossa       | 33       | Norm | Norm | Norm | Norm |
| Case 11                         | Orbital            | 25       | Norm | Norm | ---  | ---  |
| Case 12                         | Petroclival        | 50       | Norm | Norm | Norm | Norm |
| Case 13                         | Sphenocavernous    | 40       | Norm | Norm | Norm | Norm |
| Case 14                         | Sphenoid Wing      | 50       | Norm | Norm | Norm | Norm |
| Case 15                         | Tuberculum         | 31       | Norm | Norm | ---  | ---  |
| Case 16                         | Tuberculum         | 24       | Norm | Norm | ---  | ---  |
| Case 17                         | Tuberculum         | 23       | Norm | Norm | Norm | Norm |
| Case 18                         | Tuberculum         | 22       | Norm | Norm | Norm | Norm |
| Case 19                         | Tuberculum         | 22       | Norm | Norm | ---  | ---  |
| <b>Secretary (Grade I)</b>      |                    |          |      |      |      |      |
| Case 1                          | Clinoid            | 20       | Exo  | Exo  | Exo  | ---  |
| Case 2                          | Middle Fossa       | 20       | Exo  | Exo  | Norm | ---  |
| <b>Transitional (Grade I)</b>   |                    |          |      |      |      |      |
| Case 1                          | Cavernous          | 40       | Exo  | Exo  | Exo  | Exo  |
| Case 2                          | Cavernous          | 38       | Norm | Norm | Norm | ---  |
| Case 3                          | Cavernous          | 20       | Norm | Norm | Norm | ---  |
| Case 4                          | Petroclival        | 45       | Norm | Norm | Norm | Norm |
| Case 5                          | Planum             | 23       | Norm | Norm | ---  | ---  |
| Case 6                          | Planum             | 17       | Norm | Norm | ---  | ---  |
| <b>Unspecified (Grade I)</b>    |                    |          |      |      |      |      |
| Case 1                          | Cavemotentorial    | 41       | Norm | Exo  | Norm | Exo  |
| Case 2                          | Cavernous          | 100      | Exo  | Exo  | Exo  | ---  |
| Case 3                          | Clinoid            | 40       | Norm | Norm | Norm | ---  |
| Case 4                          | Clinoid            | 31       | Norm | Norm | Norm | ---  |
| Case 5                          | Clinoid            | 20       | Norm | Norm | ---  | ---  |
| Case 6                          | Planum Sphenoidale | 27       | Norm | Exo  | Norm | ---  |
| Case 7                          | Tuberculum         | 28       | Norm | Norm | Exo  | Norm |
| <b>Atypical (Grade II)</b>      |                    |          |      |      |      |      |
| Case 1                          | Cavemoclival       | 67       | Norm | Norm | ---  | ---  |
| Case 2                          | Cavemopetroclival  | 65       | Norm | Norm | Norm | ---  |
| Case 3                          | Cavernous          | 53       | Exo  | ---  | ---  | Exo  |
| Case 4                          | Cavernous          | 51       | Norm | Norm | Norm | ---  |
| Case 5                          | Cavernous          | 40       | Norm | ---  | ---  | Exo  |
| Case 6                          | Sphenocavernous    | 60       | Exo  | Exo  | Exo  | Norm |
| Case 7                          | Tuberculum         | 26       | Norm | Norm | ---  | ---  |
| <b>Unspecified (Grade II)</b>   |                    |          |      |      |      |      |
| Case 1                          | Middle Fossa       | 56       | Exo  | Exo  | ---  | ---  |

A list of the lesion locations (primary location) and maximum lesion diameters (diameter) recorded for each individual case involving a meningioma lesion. The listed lesion locations describe the presumed primary region of origination for each lesion. Additionally, the globe position status of each individual case is detailed at the preoperative (PO), 3-month postoperative follow-up (3M), 12-month postoperative follow-up (12M), and last postoperative follow-up (LFU) time points. The globe position status at each time point was characterized as either a normal globe position (Norm), enophthalmos (Eno), or exophthalmos (Exo).

**Supplementary Table S2** Variables associated with each individual case involving a nonmeningioma lesion

| Lesion Type                                 | Primary Location                 | Diameter | PO   | 3M   | 12M  | LFU  |
|---------------------------------------------|----------------------------------|----------|------|------|------|------|
| Adenoid Cystic Carcinoma (Grade II)         |                                  |          |      |      |      |      |
| Case 1                                      | Pteronial                        | ---      | Norm | Norm | Norm | ---  |
| Aneurysm                                    |                                  |          |      |      |      |      |
| Case 1                                      | Basilar Caput                    | 4        | Exo  | Norm | Eno  | Eno  |
| Chondrosarcoma (Grade I)                    |                                  |          |      |      |      |      |
| Case 1                                      | Cavernous                        | 32       | Norm | Norm | ---  | ---  |
| Chondrosarcoma (Grade II)                   |                                  |          |      |      |      |      |
| Case 1                                      | Clival                           | 28       | Exo  | Norm | Norm | Norm |
| Eperimoid Cyst                              |                                  |          |      |      |      |      |
| Case 1                                      | Middle Fossa/Posterior Fossa     | ---      | Norm | ---  | ---  | Norm |
| Ewing's Sarcoma (Metastatic)                |                                  |          |      |      |      |      |
| Case 1                                      | Sphenoid Wing                    | 22       | Norm | Norm | ---  | ---  |
| Fibrous Dysplasia; McCune-Albright Syndrome |                                  |          |      |      |      |      |
| Case 1                                      | Diffuse, Skull Base Extensions   | ---      | Norm | Norm | Norm | ---  |
| IgG4-related Disease                        |                                  |          |      |      |      |      |
| Case 1                                      | Cavernous                        | ---      | Norm | Norm | ---  | Norm |
| Neurosarcoidosis                            |                                  |          |      |      |      |      |
| Case 1                                      | Diffuse, Dural Extensions        | ---      | Norm | Norm | Norm | Norm |
| Pituitary Adenoma (Corticotroph)            |                                  |          |      |      |      |      |
| Case 1                                      | Diffuse, Skull Base Extensions   | 48       | Norm | Norm | Norm | Norm |
| Case 2                                      | Suprasellar/Cavernous Extensions | 43       | Norm | Norm | Norm | Norm |
| Pituitary Adenoma (Null Cell)               |                                  |          |      |      |      |      |
| Case 1                                      | Cavernous Extensions             | 50       | Norm | Norm | Norm | Norm |
| Pituitary Adenoma (Pleurihormonal)          |                                  |          |      |      |      |      |
| Case 1                                      | Cavernous Extensions             | 33       | Norm | Norm | Norm | Norm |

A list of the lesion locations (primary location) and maximum lesion diameters (diameter) recorded for each individual case involving a nonmeningioma lesion. The listed lesion locations describe the presumed primary region of origination for each lesion. Notable extensions were described for pituitary adenomas, as well as for lesions with diffuse intracranial involvement. Additionally, the globe position status of each individual case is detailed at the preoperative (PO), 3-month postoperative follow-up (3M), 12-month postoperative follow-up (12M), and last postoperative follow-up (LFU) time points. The globe position status at each time point was characterized as either a normal globe position (Norm), enophthalmos (Eno), or exophthalmos (Exo).
